# Supplementary material for: Changes in the rumen microbiota community in ketosis cows during propylene glycol treatment
Source: Royal Society of Chemistry journal article supplement (doi:10.1039/d1fo03800a), 2022-01-01
Supplement: d1fo03800a3.xlsx [file d1fo03800a3.xlsx]

## Sheet: Sheet1
Group	BHBA (mmol/L)	Group	BHBA (mmol/L)	Group	BHBA (mmol/L)
Control1	0.7	Ketosis1	5.1	PG1	1.1
Control2	0.6	Ketosis2	4.9	PG2	1.2
Control3	0.6	Ketosis3	2.8	PG3	2.6
Control4	0.4	Ketosis4	2.7	PG4	2.5
Control5	0.4	Ketosis5	4.2	PG5	1.3
Control6	0.4	Ketosis6	4	PG6	1.4
Control7	0.3	Ketosis7	3.7	PG7	0.6
Control8	0.2	Ketosis8	3.8	PG8	0.8
Control9	0.7	Ketosis9	2.4	PG9	0.6
Control10	0.2	Ketosis10	2.6	PG10	0.7
