# Supplementary material for: Changes in the rumen microbiota community in ketosis cows during propylene glycol treatment
Source: Royal Society of Chemistry journal article supplement (doi:10.1039/d1fo03800a), 2022-01-01
Supplement: d1fo03800a4.xlsx [file d1fo03800a4.xlsx]

## Sheet: Sheet1
Taxon			relative abundance
Phylum	Family	Genus	Cows with ketosis	Cows after PG treatment	controls	P value
Bacteroidota			38.4	44	44.4	P>0.05
	Prevotellaceae		12.3a	21.6b	36.3c	P<0.01
		Prevotella	8.6a	16.8b	31.5c	P<0.01
		Prevotellaceae_UCG-003	1.5a	1.6a	0.7b	P<0.01
	Rikenellaceae		4.7a	6.2a	1.2b	P<0.01
		Rikenellaceae_RC9_gut_group	3.9a	5.3a	1.1b	P<0.01
	F082		6.5a	4.7ab	1.5b	P<0.01
	Muribaculaceae		11.3a	7.1ab	3.9b	0.039
	Weeksellaceae		1.8	1.4	0.1	P>0.05
		Chryseobacterium	1.7	1.3	0	P>0.05
Firmicutes			44.5	40.7	39.9	P>0.05
	Lachnospiraceae		13.8a	11.6b	9.8b	P<0.01
		Butyrivibrio	1.9a	1.1b	0.2c	P<0.01
		Acetitomaculum	1.5a	1.2a	0.5b	P<0.01
	Acidaminococcaceae		1.9	4.2	3.5	P>0.05
		Succiniclasticum	1.9	4.2	3.5	P>0.05
	Christensenellaceae		4.4a	2.6b	0.7c	P<0.01
		Christensenellaceae_R-7_group	4.2a	2.5b	0.7c	P<0.01
	Oscillospiraceae		4.8a	4.2a	2.4b	P<0.01
		NK4A214_group	3.3a	2.6a	1.2b	P<0.01
	Ruminococcaceae		1.9a	2.1a	2.8b	P<0.01
		Ruminococcus	1.3a	1.5a	2.1b	P<0.01
	Streptococcaceae		0.3a	0.2a	2.5b	P<0.01
		Streptococcus	0.3a	0.2a	2.5b	P<0.01
	Hungateiclostridiaceae		2.3a	1.6b	0.8c	P<0.01
		Saccharofermentans	2.3a	1.6b	0.8c	P<0.01
Proteobacteria			7.2	5.6	8.4	P>0.05
	Succinivibrionaceae		0.2a	0.8ab	2.0b	0.04
		Succinivibrionaceae_UCG-001	0.1a	0.3ab	1.9b	0.021
	Xanthomonadaceae		3a	1.9ab	0.3b	0.034
		Luteimonas	1.5a	1.3ab	0.08b	0.0347
		Thermomonas	1.4a	0.5ab	0.04b	0.0156
	Rhodobacteraceae		1.5a	0.7ab	0.1b	0.011
		Paracoccus	1.0a	0.5ab	0.0b	P<0.01
Actinobacteriota			2.5	2.6	1.6	P>0.05
	Propionibacteriaceae		0.2	0.8	0.1	P>0.05
		Propioniciclava	0.1	0.7	0	P>0.05
unidentified_Bacteria			1.7	2	1	P>0.05
Gracilibacteria			1.4	0.6	0.3	P>0.05
