# Supplementary figures and images for: Changes in the rumen microbiota community in ketosis cows during propylene glycol treatment
Source: Royal Society of Chemistry journal article supplement (doi:10.1039/d1fo03800a), 2022-01-01

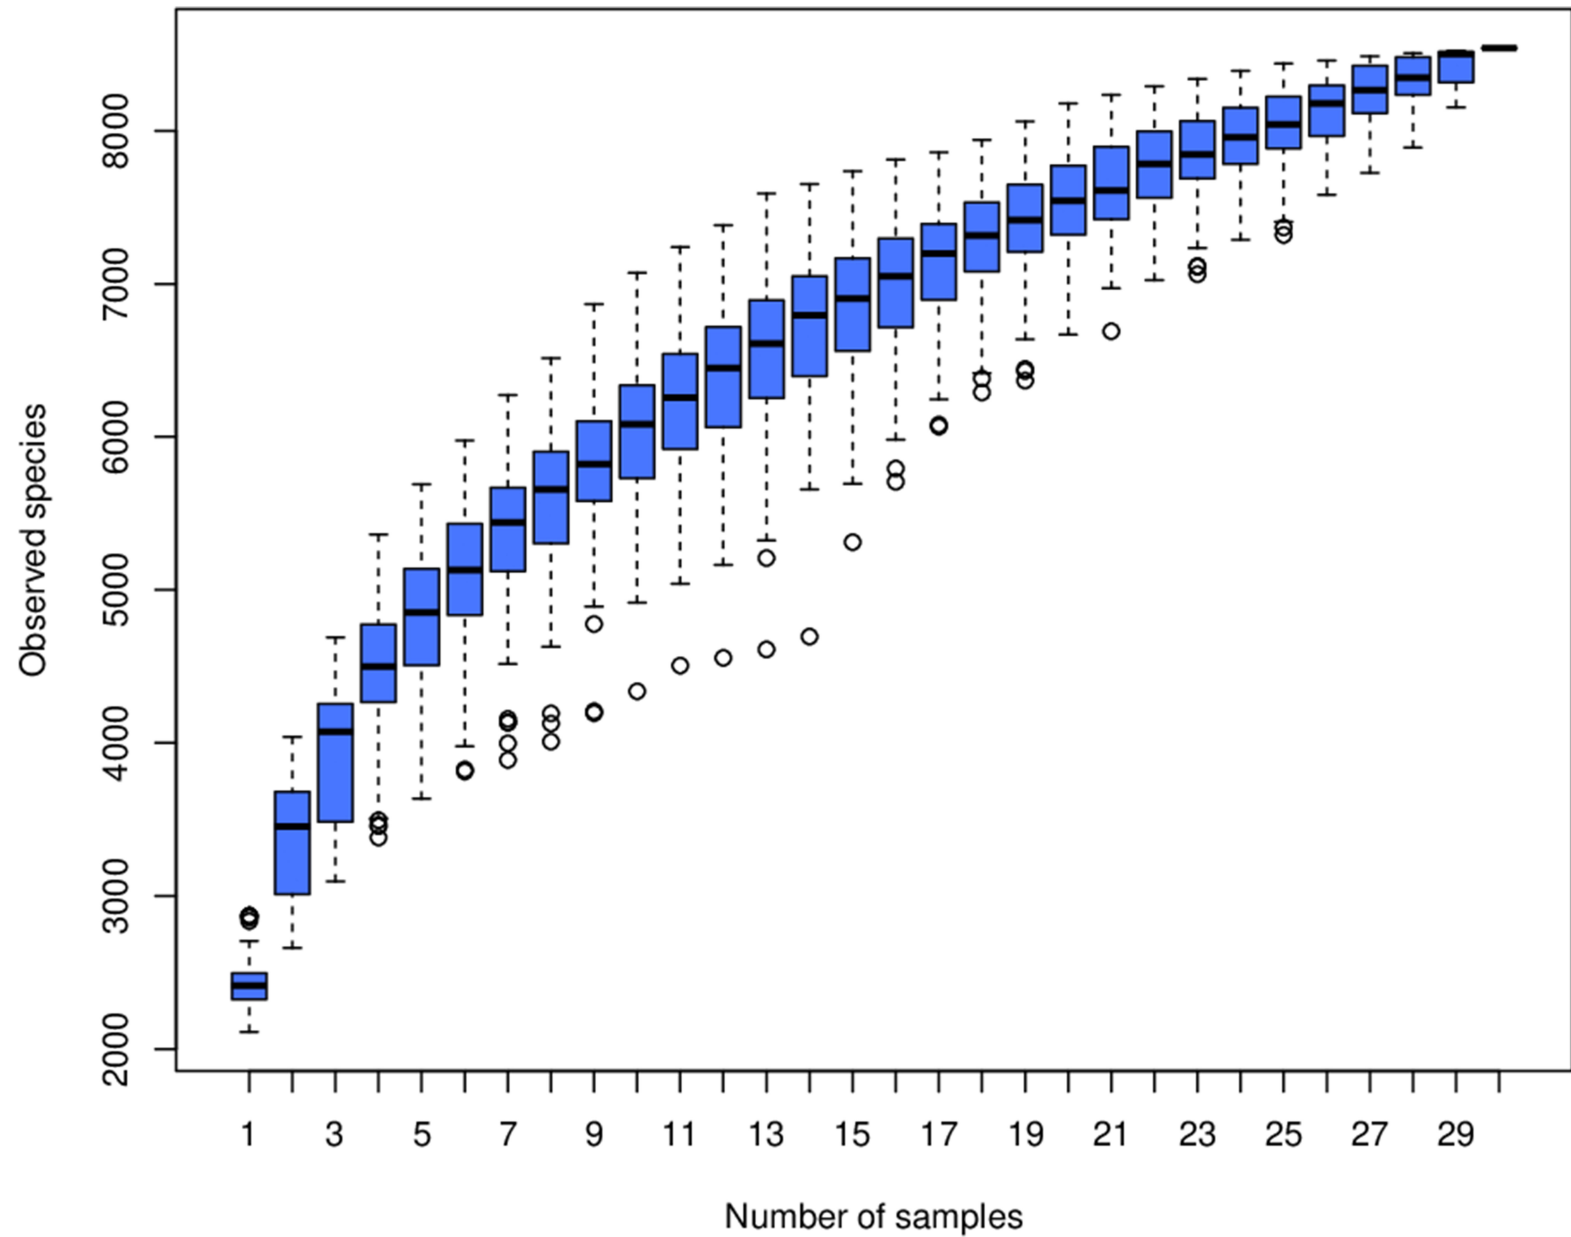

Supplement: d1fo03800a1.pdf [file d1fo03800a1.pdf]

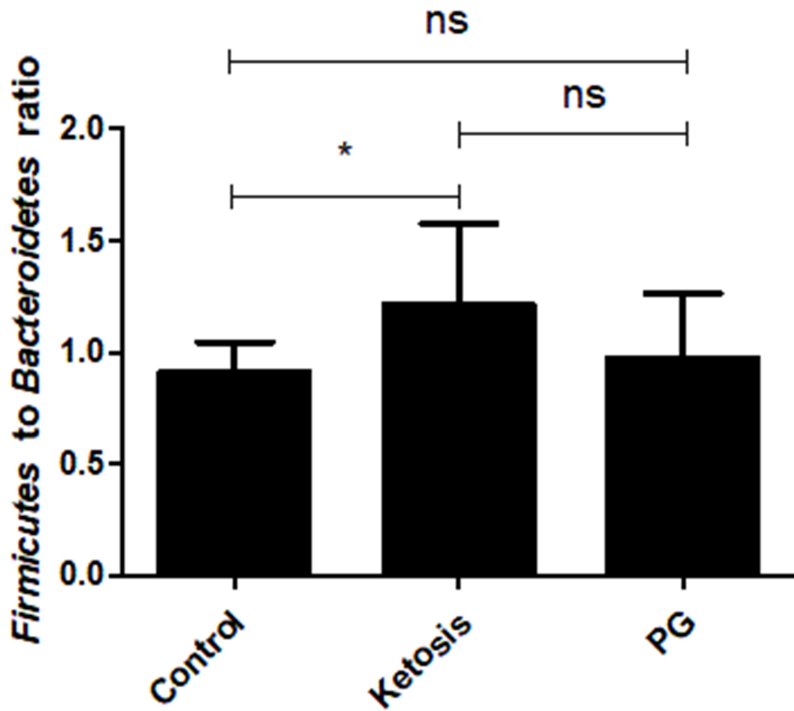

Supplement: d1fo03800a2.pdf [file d1fo03800a2.pdf]
